# Supplementary material
Source: PubMed Central journal article supplement (PMC3947918)
Supplement: NIHMS502978-supplement-1.pdf [file NIHMS502978-supplement-1.pdf]

# 1 Supplementary Data

| Gene Symbol   | Fold change<br>(from cHet UT) |             |
|---------------|-------------------------------|-------------|
|               | cHet                          | cKO         |
| 2210411K11Rik | 1.67                          | 2.07        |
| 9130213B05Rik | 1.80                          | 1.80        |
| A530088H08Rik | 1.68                          | 1.63        |
| Abcc3         | 1.86                          | 2.09        |
| Abcc4         | 2.06                          | 1.71        |
| Acsf5         | 2.14                          | 1.81        |
| Acss1         | 1.93                          | 2.02        |
| Actg2         | 7.05                          | 7.75        |
| Ahnak         | 1.77                          | 1.52        |
| Ar            | 1.98                          | 2.04        |
| Arg2          | 2.46                          | 2.07        |
| Arhgef4       | 2.14                          | 1.71        |
| Arh4c         | 2.25                          | 2.45        |
| Atad4         | 2.10                          | 2.13        |
| Atp1a1        | 2.41                          | 1.87        |
| Atp1b1        | 1.93                          | 2.18        |
| Bace2         | 1.66                          | 1.52        |
| Bicc1         | 1.61                          | 1.61        |
| <b>Bmp4</b>   | <b>2.97</b>                   | <b>3.39</b> |
| Capn6         | 1.58                          | 1.76        |
| Capsl         | 2.27                          | 2.50        |
| Car12         | 3.10                          | 2.58        |
| Cbr2          | 3.54                          | 1.77        |
| Cbr3          | 1.75                          | 1.51        |
| Ccdc3         | 1.91                          | 1.93        |
| Cond1         | 1.69                          | 1.55        |
| Cd9           | 2.13                          | 2.27        |
| Cd14          | 2.86                          | 3.19        |
| Cd44          | 1.91                          | 1.86        |
| Cd151         | 1.83                          | 1.71        |
| Cdc42se1      | 1.88                          | 1.64        |
| Cdh1          | 1.90                          | 1.65        |
| Ces3          | 3.48                          | 3.26        |
| Chodl         | 2.22                          | 2.81        |
| Claa3         | 1.82                          | 3.82        |
| Cldn3         | 1.81                          | 2.15        |
| Cldn4         | 2.95                          | 2.26        |
| Cldn6         | 1.65                          | 2.05        |
| Cldn10        | 7.49                          | 9.22        |
| Cldn11        | 3.53                          | 3.06        |
| Cntnap4       | 2.65                          | 2.38        |
| Col23a1       | 1.80                          | 1.82        |
| Cpe           | 1.51                          | 1.52        |
| Cpm           | 1.64                          | 1.71        |
| Crip2         | 1.63                          | 1.81        |
| Clsh          | 1.74                          | 1.67        |
| Ctsk          | 2.08                          | 1.71        |
| Cxcl15        | 3.11                          | 8.74        |
| Cyb561        | 2.18                          | 2.06        |
| Dkk3          | 2.06                          | 1.87        |
| Dpt           | 2.99                          | 3.03        |
| Dsg2          | 2.03                          | 1.66        |
| Dsp           | 2.20                          | 1.96        |
| Ebf3          | 2.01                          | 1.75        |
| Emb           | 3.21                          | 3.50        |
| Enpp2         | 4.79                          | 5.44        |
| Enpp5         | 1.80                          | 1.66        |
| Epb4.114b     | 1.62                          | 1.52        |
| Ern2          | 2.13                          | 2.01        |
| Erff1         | 1.77                          | 1.64        |
| Evx1          | 1.93                          | 2.02        |
| Faah          | 1.72                          | 1.84        |
| Fam134b       | 1.60                          | 1.51        |
| Fam3c         | 1.67                          | 1.56        |
| Fam46a        | 2.64                          | 2.55        |
| Fat1          | 2.40                          | 1.80        |
| Fgf10         | 2.35                          | 2.35        |
| Foxq1         | 2.68                          | 1.65        |
| Frk           | 1.63                          | 1.72        |
| Fxyd3         | 5.41                          | 4.23        |
| Gabrp         | 2.96                          | 2.57        |
| Gjb2          | 2.26                          | 2.44        |
| Gldc          | 2.54                          | 2.06        |
| Gm7665        | 1.63                          | 1.82        |
| Gm9746        | 2.38                          | 2.10        |
| Grb7          | 3.16                          | 2.81        |
| Grhl2         | 1.86                          | 1.65        |
| Gsta3         | 1.80                          | 1.90        |
| Gsta4         | 1.77                          | 1.65        |
| H2-D1         | 1.68                          | 1.61        |
| Hdc           | 8.37                          | 7.61        |
| Hexb          | 1.72                          | 1.85        |
| Hk2           | 2.09                          | 2.07        |
| Hopx          | 1.87                          | 1.60        |
| Hoxb7         | 2.10                          | 2.00        |
| Htalip2       | 1.56                          | 1.67        |
| Igf1          | 2.16                          | 2.23        |
| Igf2bp3       | 1.69                          | 1.87        |
| Igsf9         | 2.35                          | 2.24        |
| <b>Inhba</b>  | <b>2.07</b>                   | <b>1.78</b> |
| Isl1          | 9.15                          | 9.11        |
| Itih2b        | 1.82                          | 1.56        |
| Kctd1         | 2.37                          | 2.37        |
| Klf5          | 2.22                          | 1.70        |
| Krt8          | 2.14                          | 1.77        |
| Krt15         | 6.09                          | 2.65        |
| Krt18         | 1.88                          | 2.04        |
| Krtcap3       | 1.89                          | 2.15        |
| Lad1          | 1.66                          | 1.54        |
| Lamc1         | 1.57                          | 1.68        |
| Lcn2          | 3.14                          | 4.14        |
| Lgals3        | 4.92                          | 3.92        |
| Lin7a         | 1.54                          | 1.52        |
| Lig1          | 1.98                          | 1.64        |
| Lmo4          | 2.87                          | 2.49        |
| Lmo7          | 1.79                          | 1.89        |
| LOC100044677  | 1.59                          | 1.75        |
| LOC100045132  | 1.54                          | 1.50        |
| LOC100046616  | 1.80                          | 1.71        |
| LOC100047261  | 1.92                          | 2.12        |
| LOC100047936  | 1.70                          | 1.52        |
| LOC547041     | 2.36                          | 2.31        |
| Lrig1         | 1.56                          | 1.50        |
| Lrrc8d1       | 1.76                          | 1.80        |
| Lrrc15        | 1.61                          | 1.78        |
| Lrrc26        | 2.39                          | 1.86        |
| Lypd2         | 11.59                         | 10.07       |
| Med24         | 3.31                          | 3.52        |
| Mtfe8         | 2.31                          | 1.68        |
| Mtfe8         | 2.19                          | 1.59        |
| Mgst1         | 3.00                          | 2.01        |
| Mtap7         | 1.95                          | 1.81        |
| Mtus1         | 1.51                          | 1.57        |
| Myh11         | 2.83                          | 3.59        |
| Myo6          | 2.03                          | 1.75        |
| Nfkbi         | 1.52                          | 1.58        |
| Nipal2        | 1.82                          | 1.63        |
| Nr2f1         | 4.77                          | 5.42        |
| Nup210        | 1.82                          | 1.92        |
| Nupr1         | 2.09                          | 2.17        |
| Olfml2b       | 2.84                          | 2.76        |
| Pacrg         | 1.58                          | 1.64        |
| Padi1         | 6.38                          | 6.62        |
| Pamr1         | 2.41                          | 2.51        |
| Papss1        | 1.62                          | 1.58        |
| Pdcd4         | 1.78                          | 1.84        |
| Pdlim1        | 2.03                          | 2.15        |
| Pdlim3        | 2.40                          | 2.60        |
| Plk3r3        | 1.80                          | 1.97        |
| Plk4          | 2.12                          | 1.98        |
| Plec1         | 1.67                          | 1.56        |
| Plekha2       | 2.05                          | 1.77        |
| Plscr1        | 2.27                          | 2.37        |
| Pnliprp1      | 4.35                          | 5.11        |
| Ppap2b        | 1.80                          | 1.74        |
| Ppap2c        | 1.81                          | 1.73        |
| Ppp1r1b       | 2.49                          | 2.71        |
| Ppp1r3b       | 2.45                          | 2.43        |
| Ppp2r2b       | 2.31                          | 2.65        |
| Prkab1        | 1.99                          | 1.78        |
| Prss8         | 1.74                          | 1.88        |
| Ptprk         | 1.83                          | 1.63        |
| Rab15         | 2.15                          | 1.87        |
| Rab25         | 3.07                          | 2.76        |
| Rbm47         | 2.10                          | 1.61        |
| Reep6         | 1.65                          | 1.66        |
| Rerg          | 2.01                          | 1.95        |
| Rgs10         | 1.54                          | 1.56        |
| Rnaset2b      | 1.52                          | 1.66        |
| <b>Runx1</b>  | <b>1.70</b>                   | <b>1.57</b> |
| S100a11       | 1.76                          | 1.67        |
| Scx           | 1.72                          | 1.98        |
| Sema3f        | 1.97                          | 1.78        |
| Sema4a        | 2.20                          | 1.64        |
| Serpib11      | 3.25                          | 2.44        |
| Serpinf1      | 1.87                          | 1.96        |
| Shisa2        | 3.54                          | 3.63        |
| Six1          | 1.98                          | 1.94        |
| Slc46a3       | 1.79                          | 1.54        |
| Sort1         | 2.48                          | 2.36        |
| Sox9          | 1.58                          | 1.65        |
| Sox11         | 2.07                          | 1.79        |
| Spata13       | 1.74                          | 1.54        |
| Spint1        | 3.25                          | 2.49        |
| Srd5a1        | 1.90                          | 1.50        |
| Srgap3        | 1.62                          | 1.72        |
| Srpx          | 1.57                          | 1.76        |
| St6gal1       | 1.76                          | 1.55        |
| St6galnac2    | 2.43                          | 2.02        |
| Stxbp2        | 1.63                          | 1.59        |
| Sv2b          | 1.52                          | 1.77        |
| Tes           | 1.91                          | 1.62        |
| Tfrc          | 1.65                          | 1.72        |
| Thbs2         | 2.12                          | 1.79        |
| Tle4          | 2.24                          | 2.15        |
| Tmem45b       | 1.64                          | 1.58        |
| Tmem50b       | 1.55                          | 1.64        |
| Tmem59        | 1.60                          | 1.70        |
| Tmem79        | 1.80                          | 1.51        |
| Tmem176b      | 1.67                          | 1.97        |
| Tmem213       | 1.72                          | 1.93        |
| Trp63         | 5.49                          | 5.31        |
| Tspan8        | 5.50                          | 6.33        |
| Twist2        | 2.30                          | 2.11        |
| Unc13b        | 1.92                          | 1.89        |
| Upk1a         | 2.13                          | 1.82        |
| Upk2          | 3.55                          | 1.90        |
| Vcam1         | 2.87                          | 2.73        |
| Wfdc2         | 1.97                          | 1.95        |
| Wfdc15b       | 5.49                          | 5.91        |

2 **Table S1. List of genes that are >1.5 fold higher in both *Trp63* cHet and cKO vaginae than *Trp63* cHet**  
3 **uteri.** When multiple probes for a single gene are in the list, the signal for a probe that showed the highest fold  
4 change is listed. The array data GEO # GSE44697 was further analyzed at the Genomic Core of the Center for  
5 Genetic Medicine, Feinberg School of Medicine at Northwestern University, using the Bioconductor lumi and  
6 limma packages for R [1,2,3,4]. The complete dataset was normalized by quantile normalization, and the probe-  
7 set was filtered by present/absent calls based on the Illumina detection p-values – of these, 24003 out of 45281  
8 probes were kept. Differentially expressed probes were identified by a modified t-test on each probe and  
9 filtering them on the criteria that the change in expression was at least 1.5-fold and the p-value was less than  
10 0.05.

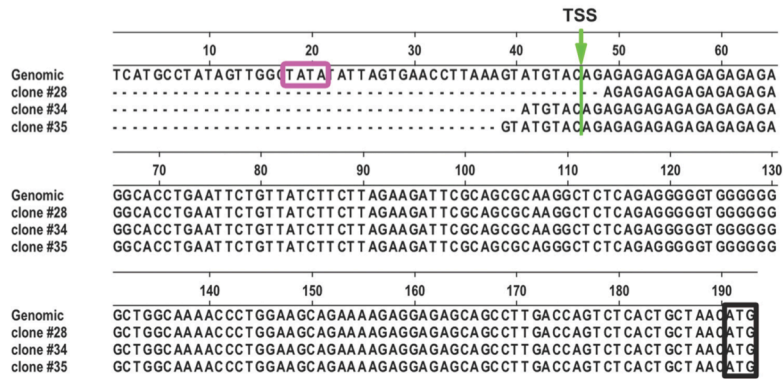

11 **Figure S1. Identification of Trp63 promoter in vaginal epithelial cells.**

12 5' RACE analysis of *Trp63* was performed for P21 vaginal epithelial RNAs. The representative 3 sequences are  
 13 aligned to genomic 5' sequence of *Trp63* exon 3', which contains ATG for  $\Delta$ Np63. The TATA box (pink box),  
 14 translational start site for  $\Delta$ Np63 (black box), and the transcriptional start site (TSS) in reference sequences  
 15 (GenBank AF075437.1, AF075438.1 and AF075439.1) are presented.

16  
 17

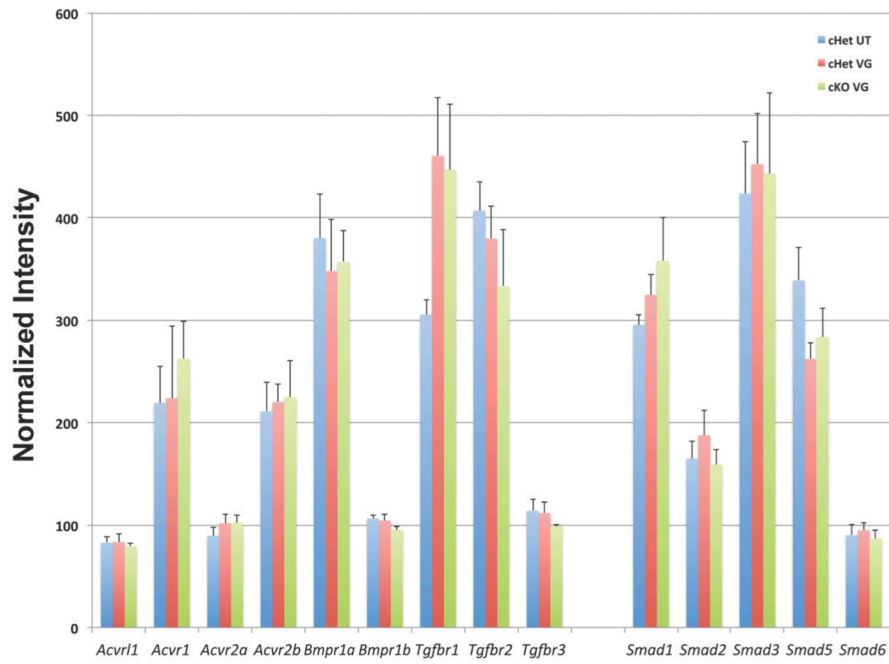

18 **Figure S2. Microarray analysis on TGF $\beta$  family signaling related genes.**

19 The graph includes genes that were detected in at least one of 3 groups with detection p-value less than 0.05.

20 Type I and II receptors, Smads and Betaglycan (*Tgfb3*) were expressed in both uterus and vagina at similar

21 levels.



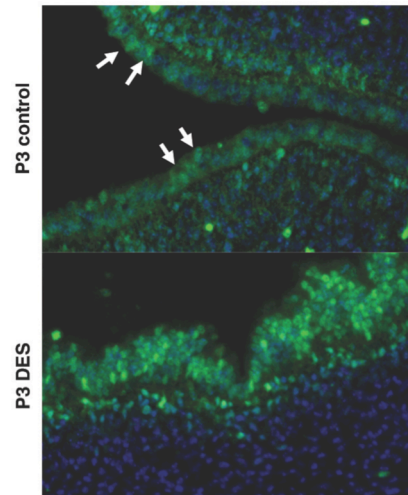

28 **Figure S4. RUNX1 expression in the uterus of P3 control and DES-treated mice.**

29 In P3 uterus, RUNX1 is expressed only in a small subset of uterine epithelial cells (arrows). However, DES-

30 treatment induces a high level of RUNX1 throughout the uterine epithelium.

31
